# Supplementary material for: Controlled catalytic domain formation by mixed iron halide compounds to decrease the waviness of carbon nanotube arrays
Source: Royal Society of Chemistry journal article supplement (doi:10.1039/c5ra17066d), 2015-01-01
Supplement: c5ra17066d1.pdf [file c5ra17066d1.pdf]

# Controlled Catalytic Domain Formation by Mixed Iron Halide Compounds for Decrease the Waviness of Carbon Nanotube Arrays

Sook Young Moon \*

Structures and Advanced Composite Research Unit, Japan Aerospace Exploration Agency (JAXA),  
6-13-1, Osawa, Mitaka, Tokyo 181-0015, Japan

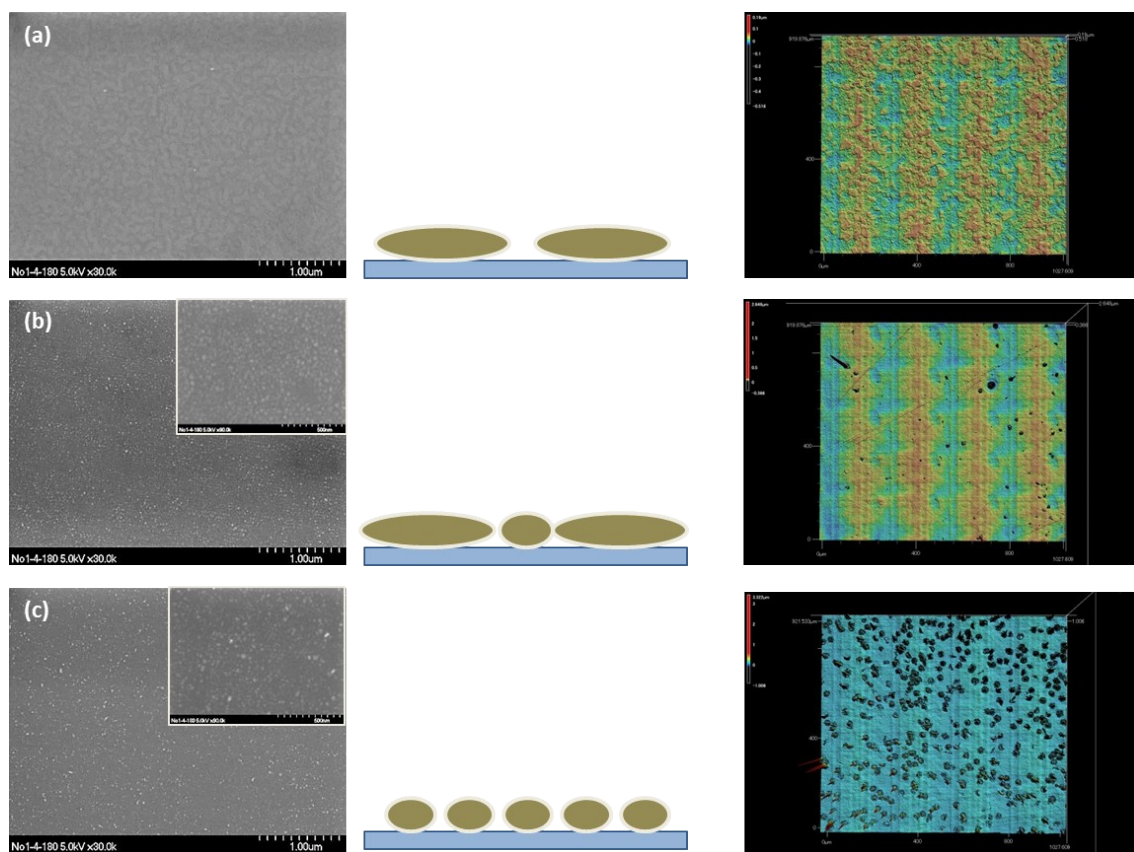

Figure S1. SEM images of substrate after annealing the CVD reaction temperature at 825 °C; (a)  $x=0$ ,  
(b)  $x=0.5$ , (c)  $x=1$

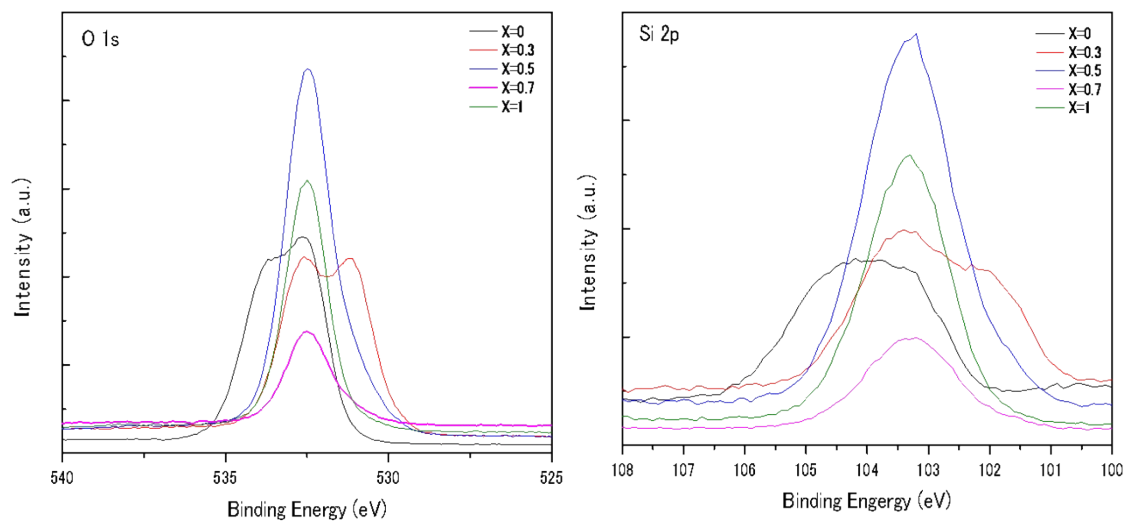

Figure S 2 . Si 2p and O1s XPS spectra of substrates after CNTs were grown using  $[x\text{FeCl}_3:(1-x)\text{FeCl}_2]$  catalysts with various values of  $x$
